# Supplementary material for: Bio-based shape memory polyurethanes (Bio-SMPUs) with short side chains in the soft segment
Source: Royal Society of Chemistry journal article supplement (doi:10.1039/c4ta01640h), 2014-01-01
Supplement: c4ta01640h1.pdf [file c4ta01640h1.pdf]

## **Bio-based shape memory polyurethanes (Bio-SMPUs) with short side chains in soft segment**

**Lisheng Zhang<sup>a</sup>, Miaoming Huang<sup>b</sup>, Ruilei Yu<sup>a</sup>, Juncheng Huang<sup>a</sup>, Xia Dong<sup>b</sup>, Ruoyu Zhang<sup>a,\*</sup>,**

**Jin Zhu<sup>a,\*</sup>**

*<sup>a</sup>Ningbo Key Laboratory of Polymer Materials, Ningbo Institute of Material Technology and Engineering, Chinese Academy of Sciences, Ningbo, Zhejiang 315201, P. R. China.*

*<sup>b</sup>Beijing National Laboratory for Molecular Sciences, CAS Key Laboratory of Engineering Plastics, Institute of Chemistry, Chinese Academy of Sciences, Beijing 100190, P. R. China.*

*\* Correspondence to: J. Zhu ([jzhu@nimte.ac.cn](mailto:jzhu@nimte.ac.cn)); R. Zhang ([zhangruoyu@nimte.ac.cn](mailto:zhangruoyu@nimte.ac.cn))*

### **Synthesis of polyester diol and preparation of bio-based SMPUs**

Then, the reaction mixture was charged into the 250 mL three-necked flask. Hydroquinone (0.4 wt % relative to total of reactants) was used as the free radical inhibitor. The mixture with 0.5 wt % p-TSA was pre-condensated under nitrogen atmosphere at 160 °C for 1 h. Then, TBT (0.5 wt% relative to total of reactants), used as the catalyst, was added. After gradually heating to 180 °C under vacuum, the condensation polymerization lasted for 5 h. The products were purified by dissolving in chloroform and precipitating in methanol. The precipitate was then filtered, washed with methanol, and vacuum-dried at 50 °C.

A typical reaction is as follows: the prescribed amount of Bio-Polyol-50 and IPDI were charged into a 250 mL three necked round-bottomed flask which was equipped with a mechanical agitator, a dry nitrogen inlet, and a reflux condenser. DBTDL with the amount of 0.5wt% was added and used as catalyst. Under nitrogen protection, the reaction mixture was then stirred at 65 °C for 3 h to form the pre-polymer. Pre-polymer isocyanate (NCO) content after synthesis was determined by titration with *N,N'*-dibutylamine. The pre-polymer was then chain extended to form a high molecular weight polymer by adding equivalent BDO to the reaction mixture and stirring at 85 °C for 3 ~5h. The reaction was terminated when the isocyanate peak (2260 cm<sup>-1</sup>) disappeared on the Fourier transform infrared spectra. After that the reaction mixture was poured into a rectangular mold which is made from polytetrafluoroethylene (PTFE) to prepare the polyurethane film for testing.

S-Table 1 The recovery property of Bio-SMPUs with 300% strain of the cyclic tensile testing at room temperature (25 °C).

|             | $R_r(1)$ | $R_r(2)$ | $R_r(3)$ | $R_r(4)$ | $R_r(5)$ |
|-------------|----------|----------|----------|----------|----------|
| Bio-SMPU121 | 85±0.1   | 96±0.5   | 98±0.6   | 98±0.4   | 98±0.1   |
| Bio-SMPU132 | 85±0.1   | 94±0.6   | 96±0.3   | 97±0.6   | 98±0.4   |
| Bio-SMPU143 | 76±3.7   | 92±1     | 95±1     | 95±0.8   | 97±0.3   |
| Bio-SMPU154 | 62±1     | 91±1     | 95±2     | 96±1     | 97±0.1   |
| Bio-SMPU165 | 32±1     | 87±3.7   | 93±1.5   | 95±0.4   | 96±1.3   |
